# Supplementary material for: High levels of gut-homing immunoglobulin A+ B lymphocytes support the pathogenic role of intestinal mucosal hyperresponsiveness in immunoglobulin A nephropathy patients
Source: PubMed Central journal article supplement — Nephrol Dial Transplant. 2020 Nov 16;36(3):452–64. doi: 10.1093/ndt/gfaa264 (PMC7898021; doi:10.1093/ndt/gfaa264), 2020-11-16
Supplement: gfaa264_supplementary_data.pdf [file gfaa264_supplementary_data.pdf]

## **High Levels of Gut Homing IgA<sup>+</sup> B Lymphocytes Support the Pathogenic Role of Intestinal Mucosal Hyper-responsiveness in IgA Nephropathy Patients**

Fabio Sallustio<sup>1, \*</sup>, Claudia Curci<sup>2,3, \*</sup>, Nada Chaoul<sup>4</sup>, Giulia Fontò<sup>3</sup>, Gabriella Lauriero<sup>3</sup>, Angela Picerno<sup>3</sup>, Chiara Divella<sup>3</sup>, Vincenzo Di Leo<sup>3</sup>, Maria De Angelis<sup>5</sup>, Sanae Ben Mkaddem<sup>6</sup>, Luigi Macchia<sup>4</sup>, Anna Gallone<sup>2</sup>, Renato C. Monteiro<sup>6</sup>, Francesco Pesce<sup>3, #</sup>, Loreto Gesualdo<sup>3, #</sup>.

1) Department of Interdisciplinary Medicine, University of Bari "Aldo Moro", Bari, Italy

2) Department of Basic Medical Sciences, Neuroscience and Sense Organs, University of Bari "Aldo Moro", Bari, Italy

3) Nephrology, Dialysis and Transplantation Unit, DETO, University "Aldo Moro" Bari, Italy

4) Allergology Unit, DETO, University "Aldo Moro" Bari, Italy

5) Department of Soil, Plant and Food Sciences, University of Bari Aldo Moro, Bari, Italy.

6) INSERM U1149, ELR8252 CNRS, Center for Research on Inflammation, Paris Diderot University, Faculty of Medicine, Paris, France;

### **SUPPLEMENTARY MATERIALS**

## **Study design and patients**

The study was carried out in accordance with the Helsinki Declaration and the European Guidelines for Good Clinical Practice and approved by our institutional Ethics Review Board (protocol number 606). Written consent was obtained from all subjects. Three groups of Caucasian volunteers were included in the study: (i) 44 IgAN patients, (ii) 23 healthy subjects (HS) without known diseases, (iii) 22 controls with non-IgA glomerulonephritis (patients with membranous glomerulonephritis and minimal change disease), matched to cases by age and gender. We analyzed B cell subpopulations by FACS in 36 IgAN patients, 13 HS and 22 controls.

Exclusion criteria included the presence of type 1 or type 2 diabetes mellitus, neurological or gastro-intestinal diseases, acute myocardial infarction or stroke in the previous 6 months, severe uncontrolled hypertension (diastolic blood pressure  $\geq 120$  mmHg and/or systolic blood pressure  $\geq 220$  mmHg), evidence or suspicion of renovascular disease, severe liver diseases, malignancies, active peptic-ulcer disease, secondary IgAN, renal allograft, pregnancy, other immunological or autoimmune disorders, alcohol abuse, psychiatric disease and inability to assess the follow-up. Subjects included in the study were not treated with antibiotics, steroids, immunosuppressive drugs and/or functional foods (probiotics and/or prebiotics) for at least three months before enrollment. All volunteers confirmed that there were no remarkable changes in meals and medication for at least 1 month.

We collected clinical data (serum creatinine, 24h-proteinuria and estimated glomerular filtration rate) referring to the time of IgAN diagnosis, corresponding to the date of renal biopsy. Serum creatinine, 24h-proteinuria, estimated glomerular filtration rate (eGFR) and Body Mass Index (BMI) were evaluated at the time of biopsy.

### **Fecal microbiome analysis**

The fecal microbiome and urinary and fecal metabolome of all subjects were previously characterized (11). Biochrom 30 series amino acid analyzer and gas-chromatography mass spectrometry/solid-phase microextraction (GC-MS/SPME) analysis were carried out for metabolomic analyses in our previous study (11). Canonical discriminant Analysis of Principal coordinates (CAP) analysis was also carried out for GC-MS/SPME data (12) and it allowed us to identify organic compounds upregulated in IgAN patients. The hypothesis of not significant differences in the multivariate location within groups was tested using the trace statistic based on 9999 permutations.

### **Determination of serum IgA**

Total IgA content in serum from each participant was measured in duplicate using ELISA. Briefly, high-adsorption polystyrene 96-microwell plates (Corning Inc.) were coated overnight with 5 µg/ml of F(ab')<sub>2</sub> fragment of a goat anti-human IgA antibody (Jackson ImmunoResearch Laboratories) in PBS at 4°C. Plates were blocked with 1% BSA in PBS containing 0.05% Tween-20 for 90 minutes at room temperature. The captured IgA was then detected with biotin-labeled F(ab')<sub>2</sub> fragment of goat IgG anti-human IgA (Biosource). The binding was measured after addition of avidin-horseradish peroxidase conjugate (ExtrAvidin; Sigma-Aldrich), and the reaction was developed with the peroxidase chromogenic substrate o-phenylenediamine-H<sub>2</sub>O<sub>2</sub> (Sigma-Aldrich). The color reaction was stopped with 2 NH<sub>2</sub>SO<sub>4</sub>, and the OD at 490 nm was determined in a microplate reader (GDV, Italy; model DV 990 B/V6) (13).

### **Detection of Gd-IgA1**

Gd-IgA1 was detected by a Helix Aspersa Agglutinin (HAA) lectin binding assay (Sigma-Aldrich), as reported elsewhere (14–17). High-adsorption polystyrene 96-microwell plates (Corning Inc.)

were coated overnight with 3 µg/ml of F(ab')<sub>2</sub> fragment of goat anti-human IgA antibody (Jackson ImmunoResearch Laboratories) in PBS at 4°C. Plates were blocked for 3 hours at room temperature with 1% BSA/PBS containing 0.1% Tween-20. Two samples, working as standard inter-assay controls, were added for each plate. The captured IgA was subsequently desialylated by treatment for 3 hours at 37°C with 20 mU/ml neuraminidase from *Vibrio cholerae* (Sigma-Aldrich) in 10 mM sodium acetate buffer (pH 5). Samples were then incubated for 3 hours at 37°C with 2 µg/ml of GalNAc-specific biotinylated HAA lectin (Sigma-Aldrich) diluted in blocking buffer. The lectin binding was detected with avidin-horseradish peroxidase conjugate (ExtrAvidin) diluted in blocking buffer, and the reaction was developed with the peroxidase chromogenic substrate o-phenylenediamine-H<sub>2</sub>O<sub>2</sub> (Sigma-Aldrich). The color reaction was stopped with 2 NH<sub>2</sub>SO<sub>4</sub>, and the optical density (OD) at 490 nm was determined in a microplate reader (GDV, Italy; model DV 990 B/V6).

### **Flow cytometry analysis**

Peripheral blood mononuclear cells (PBMC) were isolated by gradient centrifugation with Ficoll-Hypaque. PBMC were then stained with the following monoclonal antibodies (mAbs) for flow cytometry analysis (FACS): Vio Blue-conjugated anti-CD19 (clone LT19), APC-conjugated anti-CD24 (clone REA832), PECy7-conjugated anti-CD38 (clone REA671), PerCP vio700-conjugated anti-IgA (clone REA1014), PE-conjugated anti-Integrin β7 (clone REA441) and FITC-conjugated anti-CCR9 (clone REA469) (or their corresponding isotype controls). PBMC were incubated for 20 min with the antibody mixes in the dark at 4°C, washed twice and resuspended in FACS buffer. All mAbs and their respective isotypes were purchased from Miltenyi Biotec (Bologna, Italy). The anti-CD19 antibody was used to identify total B cells (CD19<sup>+</sup> cells), then the anti-CD38 and anti-CD24 were used to distinguish B cells subsets: Naïve B cells (CD24<sup>dim</sup> CD38<sup>dim</sup> B cells), Memory B cells (CD24<sup>+</sup> CD38<sup>-</sup> B cells), plasmablasts (CD24<sup>-</sup> CD38<sup>+</sup> B cells) and regulatory B cells (Bregs; CD24<sup>+</sup> high CD38<sup>+</sup> high B cells). Within each of these subsets, we detected the presence of IgA and analyzed the expression of integrin β7 and CCR9 (two gut homing receptors). Stained cells were

then acquired on a Navios cytometer (Beckman coulter, Milan, Italy) and analyzed using the Flowjo software (Treestar Inc. USA). 500000 cells for each sample were analyzed (Supplemental Table 2).

**Supplementary Table 1:**

| Metabolite                                 | IgAN Patient mean value | HS mean value |
|--------------------------------------------|-------------------------|---------------|
| 1-butanol                                  | 0.113613422             | 0.066484238   |
| 1-tridecan-4-ol                            | 0.058368396             | 0.093971787   |
| 2-butanone(CHETONE)                        | 4.368852085             | 1.536423261   |
| 2,4-dimethyl-1-heptene                     | 0.805443087             | 0.334016479   |
| 2,6-dimethyl-4-heptanone                   | 0.123243592             | 0.029345184   |
| 2,6-octadien-1-ol, 3,7-dimethyl- (Z) ALCOL | 2.31681671              | 0.306219288   |
| 4-heptanone                                | 0.024139627             | 0.011377249   |
| acetic acid                                | 0.517115699             | 0.110686176   |
| acetic acid, butyl ester                   | 0.08900047              | 0.018695096   |
| 1,4-bis(1,1-dimethylethyl)- benzene,       | 2.451964023             | 6.553099852   |
| benzoic acid, hexadecyl ester              | 0.053850809             | 0.065737351   |
| butanoic acid (SCFA)                       | 1.627721809             | 0.316222065   |
| butanoic acid, ethyl ester ESTERE          | 3.275487005             | 0.717615463   |
| ethyl acetate                              | 0.724472503             | 0.110969141   |
| ethyl alcohol ALCOL                        | 1.557697438             | 0.451946628   |
| Furanone A                                 | 1.864100089             | 1.51782679    |
| indole                                     | 0.128874758             | 0.137613466   |
| pentanoic acid                             | 0.350491195             | 0.115220355   |
| indole2                                    | 0.128874758             | 0.137613466   |
| phenol, 4-(1,1,3,3-tetramethylbutyl)-ALCOL | 0.290948745             | 0.310465876   |
| phenol, p-tert-butyl-                      | 0.063221793             | 0.062528059   |
| phthalic acid, methyl neopentyl ester?     | 0.155014429             | 0.168858503   |
| propanoic acid                             | 0.312805969             | 0.058475403   |
| propanoic acid, ethyl ester                | 1.660569897             | 0.278019133   |
| methyl isobutyl ketone                     | 0.063469766             | 0.062455313   |
| tridecanal                                 | 0.217271856             | 0.003526314   |

**Supplementary Table 2:**

|                  | TOTAL CELL NUMBER | Lymphocytes Freq. of Parent | B cells in lymphocytes | Naive B cells in B cells | Bregs            |                    |                     |                         | Memory B cells            |                             |                            |                                  | Plasmablasts             |                            |                                     |                                 |  |  |
|------------------|-------------------|-----------------------------|------------------------|--------------------------|------------------|--------------------|---------------------|-------------------------|---------------------------|-----------------------------|----------------------------|----------------------------------|--------------------------|----------------------------|-------------------------------------|---------------------------------|--|--|
|                  |                   |                             |                        |                          | Bregs in B cells | B7+ CCR9+ in Bregs | IgA+ Bregs          |                         | Memory B cells in B cells | B7+ CCR9+ in Memory B cells | IgA+ Memory B              |                                  | Plasma blasts in B cells | B7+ CCR9+ in Plasma blasts | IgA+ Plasmablasts                   |                                 |  |  |
|                  |                   |                             |                        |                          |                  |                    | IgA+ Bregs in Bregs | B7+ CCR9+ in IgA+ Bregs |                           |                             | Memory B in Memory B cells | B7+ CCR9+ in IgA+ Memory B cells |                          |                            | IgA+ Plasma blasts in Plasma blasts | B7+ CCR9+ in IgA+ Plasma blasts |  |  |
| Healthy subjects | 500000            |                             |                        |                          |                  |                    |                     |                         |                           |                             |                            |                                  |                          |                            |                                     |                                 |  |  |
| MEAN HS          |                   | 273923.08                   | 6757.60                | 4695.29                  | 206.51           | 18.73              | 7.14                | 0.59                    | 1398.61                   | 42.46                       | 64.80                      | 6.94                             | 36.13                    | 4.47                       | 7.99                                | 1.62                            |  |  |
| SEM              |                   | 22308.43                    | 757.85                 | 559.46                   | 40.52            | 7.78               | 3.39                | 0.33                    | 203.71                    | 13.30                       | 10.67                      | 2.78                             | 6.10                     | 1.28                       | 1.96                                | 0.50                            |  |  |
| IgAN             | 700000            |                             |                        |                          |                  |                    |                     |                         |                           |                             |                            |                                  |                          |                            |                                     |                                 |  |  |
| MEAN IgAN        |                   | 412301.94                   | 11766.45               | 7204.64                  | 381.65           | 56.68              | 12.34               | 3.87                    | 2944.75                   | 248.10                      | 180.31                     | 39.26                            | 351.35                   | 89.60                      | 144.63                              | 64.19                           |  |  |
| SEM              |                   | 28511.91                    | 1155.00                | 768.49                   | 50.10            | 12.90              | 3.05                | 0.83                    | 402.24                    | 69.91                       | 31.69                      | 10.30                            | 120.47                   | 30.19                      | 52.84                               | 26.28                           |  |  |
| CONTROLS         | 700000            |                             |                        |                          |                  |                    |                     |                         |                           |                             |                            |                                  |                          |                            |                                     |                                 |  |  |
| MEAN CTR         |                   | 390285.00                   | 10089.74               | 6040.76                  | 425.75           | 51.14              | 8.28                | 3.50                    | 1703.32                   | 83.77                       | 169.53                     | 14.59                            | 308.08                   | 31.62                      | 69.88                               | 13.67                           |  |  |
| SEM              |                   | 33678.34                    | 1942.99                | 1210.04                  | 75.79            | 14.71              | 3.15                | 1.56                    | 621.85                    | 28.82                       | 88.16                      | 4.81                             | 148.78                   | 5.87                       | 32.08                               | 3.92                            |  |  |

Mean and standard error of the cells for each of the analyzed B-cell populations
